# Supplementary material
Source: Elsevier journal article supplement (https://www.sciencedirect.com/science/article/pii/S0300893221004097)
Supplement: mmc1 [file S0300893221004097:mmc1.pdf]

**SUPPLEMENTARY DATA****Table 1 of supplementary data**

Comparison of lipoprotein profile between patients with ischemic and nonischemic heart failure

|                                     | Heart failure       |                      | <i>P</i> |
|-------------------------------------|---------------------|----------------------|----------|
|                                     | Ischemic            | Nonischemic          |          |
|                                     | n = 205             | n = 224              |          |
| <b>Total cholesterol, mg/dL</b>     | 181.80 ± 32.13      | 207.62 ± 38.54       | < .001   |
| <b>Total triglycerides, mg/dL</b>   | 122.46 ± 44.31      | 135.56 ± 61.53       | .011     |
| <b>VLDL particle number, nmol/L</b> |                     |                      |          |
| <i>Total</i>                        | 48.83 [37.81-68.10] | 53.54 [38.58-77.74]  | .051     |
| Large                               | 1.39 [1.09-1.69]    | 1.39 [1.09-1.84]     | .443     |
| Medium                              | 5.45 [4.10-7.10]    | 5.82 [4.22-8.47]     | .001     |
| Small                               | 42.41 [32.52-59.15] | 46.36 [33.31-68.00]  | .062     |
| <i>VLDL-C, mg/dL</i>                | 18.53 [13.69-24.44] | 20.29 [15.12-28.89]  | .001     |
| <i>VLDL-TG, mg/dL</i>               | 67.34 [50.82-90.64] | 71.24 [50.98-104.05] | .068     |
| <i>VLDL-Z, nm</i>                   | 42.17 ± 0.21        | 42.17 ± 0.19         | .871     |
| <b>LDL particle number, nmol/L</b>  |                     |                      |          |
| <i>Total</i>                        | 1064 ± 233.4        | 1238 ± 285.3         | < .001   |
| Large                               | 167.4 ± 32.2        | 191.0 ± 39.4         | < .001   |
| Medium                              | 298.1 ± 104.3       | 378.1 ± 130.6        | < .001   |
| Small                               | 598.4 ± 119.0       | 669.2 ± 144.2        | < .001   |
| <i>LDL-C, mg/dL</i>                 | 101.55 ± 23.68      | 118.92 ± 28.86       | < .001   |
| <i>LDL-TG, mg/dL</i>                | 15.75 ± 4.60        | 18.76 ± 6.31         | < .001   |
| <i>LDL-Z, nm</i>                    | 21.01 ± 0.23        | 21.07 ± 0.25         | .005     |
| <b>HDL particle number, μmol/L</b>  |                     |                      |          |
| <i>Total</i>                        | 24.57 ± 5.25        | 26.69 ± 5.40         | < .001   |
| Large                               | 0.28 [0.26-0.31]    | 0.30 [0.27-0.33]     | .003     |
| Medium                              | 10.00 ± 1.80        | 10.44 ± 2.13         | .023     |
| Small                               | 14.28 ± 4.85        | 15.94 ± 4.86         | < .001   |
| <i>HDL-C, mg/dL</i>                 | 46.66 ± 9.85        | 50.32 ± 10.61        | < .001   |
| <i>HDL-TG, mg/dL</i>                | 16.30 [14.25-18.98] | 17.29 [14.50-20.81]  | .020     |
| <i>HDL-Z, nm</i>                    | 8.33 [8.26-8.41]    | 8.31 [8.25-8.40]     | .042     |
| <b>HDL-C/P ratio</b>                | 49.52 ± 5.89        | 49.01 ± 5.78         | .361     |

*Teis A, et al. 1H magnetic resonance spectroscopy lipoprotein profile in patients with chronic heart failure versus matched controls*

-C, cholesterol content; HDL, high density lipoprotein; HDL-C/P, HDL cholesterol per HDL particle ratio;

LDL, low-density lipoprotein; -TG, triglyceride content; VLDL, very low density lipoprotein; -Z, mean

normalized particle size.

The results are expressed as mean  $\pm$  standard deviation or median [25th-75th] percentiles.

Table 2 of the supplementary data

Comparison between cholesterol, triglycerides and lipoprotein subclasses between patients with heart failure and controls according to body mass index

|                              |          | Heart failure       | Controls            | P      |
|------------------------------|----------|---------------------|---------------------|--------|
|                              |          | n = 429             | n = 428             |        |
|                              | BMI      |                     |                     |        |
|                              |          |                     |                     |        |
| Total cholesterol, mg/dL     | < 25     | 200 ± 39.3          | 209.5 ± 29.8        | .068   |
|                              | 25 to 30 | 191.9 ± 39.4        | 216.5 ± 32.5        | < .001 |
|                              | ≥ 30     | 194.6 ± 32.6        | 216.9 ± 39.32       | < .001 |
| Total triglycerides, mg/dL   | < 25     | 107.8 [90.6-136.9]  | 88.5 [73.5-109.6]   | < .001 |
|                              | 25 to 30 | 114.9 [90.9-151.6]  | 113.9 [90.3-140.3]  | .337   |
|                              | ≥ 30     | 129.8 [103.3-157.6] | 132.9 [105.6-165.9] | .167   |
| VLDL particle number, nmol/L |          |                     |                     |        |
| Total                        | < 25     | 47.5 [34.6-65.2]    | 34.9 [27.3-43.4]    | < .001 |
|                              | 25 to 30 | 50.8 [38.5-74.4]    | 49.4 [34.5-70.3]    | .366   |
|                              | ≥ 30     | 61.0 [43.3-80.4]    | 63.6 [46.3-88.8]    | .092   |
| Large                        | < 25     | 1.22 [1.01-1.62]    | 1.00 [0.81-1.31]    | < .001 |
|                              | 25 to 30 | 1.38 [1.14-1.80]    | 1.37 [1.02-1.87]    | .951   |
|                              | ≥ 30     | 1.55 [1.29-1.91]    | 1.70 [1.30-2.21]    | .028   |
| Medium                       | < 25     | 5.28 [3.92-6.69]    | 3.58 [2.50-4.83]    | < .001 |
|                              | 25 to 30 | 5.68 [4.19-7.56]    | 4.10 [2.98-5.60]    | < .001 |
|                              | ≥ 30     | 6.15 [4.47-8.41]    | 4.91 [3.40-6.67]    | .657   |
| Small                        | < 25     | 40.58 [30.09-57.15] | 30.01 [23.68-38.05] | < .001 |
|                              | 25 to 30 | 44.22 [33.12-63.77] | 42.65 [30.07-62.73] | .614   |
|                              | ≥ 30     | 53.23 [37.63-71.39] | 56.03 [40.58-80.67] | .056   |
| VLDL-C, mg/dL                | < 25     | 17.8 [13.4-23.7]    | 11.7 [7.8-17.1]     | < .001 |
|                              | 25 to 30 | 18.9 [14.5-27.1]    | 17.2 [11.6-24.4]    | .016   |
|                              | ≥ 30     | 21.2 [16.9-29.6]    | 22.0 [16.2-27.9]    | .665   |
| VLDL-TG, mg/dL               | < 25     | [46.5-62.9-85.9]    | 45.8 [37.1-57.8]    | < .001 |
|                              | 25 to 30 | 69.6 [53.0-96.9]    | 65.2 [46.2-90.0]    | .170   |
|                              | ≥ 30     | 80.8 [58.4-108.9]   | 82.6 [61.6-111.1]   | .177   |
| VLDL-Z, nm                   | < 25     | 42.19 ± 0.19        | 42.03 ± 0.30        | < .001 |
|                              | 25 to 30 | 42.17 ± 0.21        | 41.90 ± 0.42        | < .001 |
|                              | ≥ 30     | 42.15 ± 0.20        | 41.85 ± 0.46        | < .001 |
| LDL particle number, nmol/L  |          |                     |                     |        |
| Total                        | < 25     | 1198 ± 297.5        | 1306 ± 229.2        | .006   |
|                              | 25 to 30 | 1129 ± 284.3        | 1368 ± 269.4        | < .001 |
|                              | ≥ 30     | 1143 ± 221.4        | 1353 ± 325.7        | < .001 |
| Large                        | < 25     | 189.6 ± 41.3        | 183.3 ± 31.1        | .246   |
|                              | 25 to 30 | 176.1 ± 37.6        | 184.3 ± 37.2        | .033   |

Teis A, et al. <sup>1</sup>H magnetic resonance spectroscopy lipoprotein profile in patients with chronic heart failure versus matched controls

|                                    |          |                  |                  |         |
|------------------------------------|----------|------------------|------------------|---------|
|                                    | ≥ 30     | 173.0 ± 31.2     | 178.8 ± 46.8     | .265    |
| Medium                             | < 25     | 373.1 ± 134.3    | 387.4 ± 120.7    | .437    |
|                                    | 25 to 30 | 326.5 ± 127.4    | 388.0 ± 136.1    | < .001  |
|                                    | ≥ 30     | 319.0 ± 98.4     | 357.8 ± 141.2    | .016    |
| Small                              | < 25     | 635.4 ± 144.2    | 735.6 ± 115.4    | < .001  |
|                                    | 25 to 30 | 626.6 ± 142.3    | 795.9 ± 157.6    | < .001  |
|                                    | ≥ 30     | 651.5 ± 117.6    | 816.8 ± 216.6    | < .001  |
| LDL-C, mg/dL                       | < 25     | 116.0 ± 30.2     | 128.7 ± 24.1     | .002    |
|                                    | 25 to 30 | 108.2 ± 28.5     | 131.8 ± 27.2     | < .001  |
|                                    | ≥ 30     | 107.8 ± 22.3     | 127.9 ± 31.7     | < .001  |
| LDL-TG, mg/dL                      | < 25     | 18.3 ± 5.8       | 16.1 ± 4.5       | .003    |
|                                    | 25 to 30 | 16.7 ± 5.8       | 17.4 ± 5.0       | .158    |
|                                    | ≥ 30     | 17.1 ± 5.6       | 17.7 ± 5.5       | .386    |
| LDL-Z, nm                          | < 25     | 21.13 ± 0.23     | 21.04 ± 0.28     | .013    |
|                                    | 25 to 30 | 21.03 ± 0.24     | 20.93 ± 0.37     | .002    |
|                                    | ≥ 30     | 20.95 ± 0.23     | 20.84 ± 0.44     | .018    |
|                                    |          |                  |                  |         |
| <b>HDL particle number, μmol/L</b> |          |                  |                  |         |
| Total                              | < 25     | 25.49 ± 5.26     | 28.81 ± 5.20     | < .001  |
|                                    | 25 to 30 | 25.48 ± 5.20     | 28.02 ± 5.08     | < .001  |
|                                    | ≥ 30     | 26.14 ± 5.87)    | 27.13 ± 4.16)    | .120    |
| Large                              | < 25     | 0.30 [0.26-0.33] | 0.27 [0.25-0.29] | < .001  |
|                                    | 25 to 30 | 0.29 [0.26-0.32] | 0.27 [0.25-0.30] | < .001  |
|                                    | ≥ 30     | 0.29 [0.27-0.32] | 0.27 [0.25-0.31] | < .001  |
| Medium                             | < 25     | 10.56 ± 2.03     | 9.61 ± 1.54      | < .001  |
|                                    | 25 to 30 | 10.10 ± 1.83     | 8.97 ± 1.54      | < 0.001 |
|                                    | ≥ 30     | 9.98 ± 2.13      | 8.71 ± 1.32      | < .001  |
| Small                              | < 25     | 14.62 ± 4.77     | 18.94 ± 4.45     | < .001  |
|                                    | 25 to 30 | 15.09 ± 4.82     | 18.77 ± 4.32     | < .001  |
|                                    | ≥ 30     | 15.86 ± 5.15     | 18.14 ± 3.88     | < .001  |
| HDL-C, mg/dL                       | < 25     | 49.3 ± 10.8      | 56.0 ± 12.2      | < .001  |
|                                    | 25 to 30 | 48.0 ± 9.9       | 52.2 ± 11.6      | < .001  |
|                                    | ≥ 30     | 48.3 ± 10.6      | 49.4 ± 8.9       | .371    |
| HDL-TG, mg/dL                      | < 25     | 16.4 [14.4-19.6] | 15.4 [13.3-19.8] | .128    |
|                                    | 25 to 30 | 16.8 [14.3-19.1] | 17.2 [14.8-20.0] | .565    |
|                                    | ≥ 30     | 16.8 [14.5-20.4] | 18.3 [14.9-21.3] | .555    |
| HDL-Z, nm                          | < 25     | 8.34 [8.27-8.43] | 8.26 [8.22-8.31] | < .001  |
|                                    | 25 to 30 | 8.33 [8.26-8.40] | 8.24 [8.18-8.31] | < .001  |
|                                    | ≥ 30     | 8.29 [8.24-8.38] | 8.25 [8.18-8.31] | < .001  |
|                                    |          |                  |                  |         |
| <b>HDL-C/P ratio</b>               | < 25     | 50.32 ± 6.32     | 50.01 ± 3.32     | .680    |
|                                    | 25 to 30 | 49.10 ± 5.81     | 47.92 ± 4.06     | .020    |
|                                    | ≥ 30     | 48.12 ± 5.25     | 47.02 ± 3.87     | .058    |

*Teis A, et al. 1H magnetic resonance spectroscopy lipoprotein profile in patients with chronic heart failure versus matched controls*

-C, cholesterol content; BMI, body mass index; HDL, high density lipoprotein; HDL-C/P, HDL cholesterol per HDL particle ratio; HF, heart failure; LDL, low-density lipoprotein; -TG, triglyceride content; VLDL, very low density lipoprotein; -Z, mean normalized particle size.

The results are expressed as mean  $\pm$  standard deviation or median [25<sup>th</sup>-75<sup>th</sup>] percentiles.

Patient number per group: HF and BMI < 25: n = 139; HF and BMI 25- < 30: n = 185; HF and BMI  $\geq$  30: 104; no-HF and BMI < 25: n = 77; no-HF and BMI 25- < 30: n = 205; no-HF and BMI  $\geq$  30: n = 146.
